# Supplementary material
Source: PubMed Central journal article supplement (PMC2910247)
Supplement: NIHMS191739-supplement-01.pdf [file NIHMS191739-supplement-01.pdf]

**Supplemental Table 1.** Hyperproliferation in *ptc* expression domain quantification

| <b>Genotype</b>                                         | <b><i>ptc</i> area/total area</b> | <b>Std dev</b> | <b>N</b> | <b>P</b>      |
|---------------------------------------------------------|-----------------------------------|----------------|----------|---------------|
| <i>ptc&gt;P35</i>                                       | 0.126                             | 0.0194         | 10       | <0.0000000001 |
| <i>ptc&gt;Cdc42-RNAi + P35</i>                          | 0.304                             | 0.0448         | 27       | N/A           |
| <i>ptc&gt;Cdc42-RNAi + P35 + Puc</i>                    | 0.205                             | 0.0737         | 6        | 0.019         |
| <i>ptc&gt;Cdc42-RNAi + P35 + JNK-RNAi</i>               | 0.202                             | 0.0324         | 11       | 0.000000025   |
| <i>ptc&gt;Cdc42-RNAi + P35 + Rho1<sup>72F</sup> +/-</i> | 0.219                             | 0.0194         | 9        | 0.0000000045  |
| <i>ptc&gt;Cdc42-RNAi + P35 + Zip<sup>1</sup> -/+</i>    | 0.223                             | 0.0482         | 9        | 0.00057       |
| <i>ptc&gt;Cdc42-RNAi + P35 + Rpr</i>                    | 0.257                             | 0.0491         | 5        | 0.093         |
| <i>ptc&gt;Cdc42-RNAi + P35 + Diap1</i>                  | 0.329                             | 0.0464         | 9        | 0.21          |
| <i>ptc&gt;Cdc42-RNAi + P35 + Th<sup>1</sup> -/+</i>     | 0.305                             | 0.0692         | 5        | 0.99          |

Quantification of hyperproliferation in *ptc* expression domain. The areas of GFP-positive cells in the *ptc* expression domain and the total wing disc areas were measured by outlining the respective regions and determining the number of pixels within the outline. Quantifications were performed using ImageJ v1.38. P-values were calculated using an unpaired, two-sided Student's t-test against *ptc>Cdc42-RNAi + P35*. N/A: not applicable.

## Supplemental Figure Legends

**Figure S1.** Discs large depletion induces apoptosis and activates JNK but does not regulate apoptosis-induced compensatory proliferation; Crb depletion does not induce apoptosis or activate JNK

Confocal immunofluorescent localization of DE-cadherin (A, A', B), Discs large (Dlg) (A, A''), and activated Caspase 3 (A, A''', B') in larval wing discs expressing Dlg-RNAi alone (A) and in a *puc*<sup>E69</sup> heterozygous background (B) using *en-gal4*. Confocal immunofluorescent localization of DE-cadherin (C, D) and activated Caspase 3 (C', D') in larval wing discs expressing Cdc42-RNAi (C) and Dlg-RNAi (D) using *en-gal4* 3 hours after 40 Gy of irradiation exposure. Confocal immunofluorescent localization of DE-cadherin (E, E', F, G), Crumbs (Crb) (E, E'''), activated Caspase 3 (F'), and  $\beta$ -galactosidase (G') in larval wing discs expressing Crb-RNAi alone using *ptc-gal4* (E, F) and in a *puc*<sup>E69</sup> heterozygous background using *en-gal4* (G). Scale bars represent 100  $\mu$ m (A-D, F, G) and 10  $\mu$ m (E).

**Figure S2.** Scribble depletion induces apoptosis and activates JNK but does not regulate apoptosis-induced compensatory proliferation; and Rho1 depletion induces apoptosis but not compensatory proliferation

Confocal immunofluorescent localization of DE-cadherin (A, B), activated Caspase 3 (A'), and MMP1 (B') in larval eye discs with GFP-labeled *scrib*<sup>1</sup> clones alone (A) and GFP-labeled *scrib*<sup>1</sup> clones expressing P35 (B). Adult eyes resulting from generation of clones expressing P35 (C) and *scrib*<sup>1</sup> clones expressing P35 (D). Confocal

immunofluorescent localization of DE-cadherin (E, F) and activated Caspase 3 (E') in larval wing discs expressing Rho1-RNAi (E), and co-expressing Rho1-RNAi with P35 (F) using *ptc-gal4*. Scale bars represent 100  $\mu\text{m}$ .

**Figure S3.** Cdc42/Par6/aPKC complex regulate JNK activity

Confocal immunofluorescent localization of DE-cadherin (A) and  $\beta$ -galactosidase (A') in larval eye disc with GFP-labeled *Cdc42<sup>d</sup>* clones in a heterozygous background of *puc<sup>E69</sup>* (*puc-lacZ*). Confocal immunofluorescent localization of DE-cadherin (B-E) and MMP1 (B'-E') in larval eye discs with GFP-labeled P35 expressing clones (B), *Cdc42<sup>d</sup>* clones expressing P35 (C), *par6<sup>A226</sup>* clones expressing P35 (D), and *aPKC<sup>K06430</sup>* clones expressing P35 (E). Confocal immunofluorescent localization of DE-cadherin (F) and Wingless (Wg) (F'') in larval wing disc co-expressing Cdc42-RNAi and P35 with *en-gal4*. Confocal immunofluorescent localization of DE-cadherin (G, H) and phospho-MAD (pMAD) (G, G'', H, H'') in larval wing discs expressing P35 alone (G) and P35 and Cdc42-RNAi (H) with *ptc-gal4*. Scale bars represent 100  $\mu\text{m}$ .

**Figure S4.** Par6<sup>ISAA</sup> expression mislocalizes aPKC and Cdc42 depletion does not mislocalize Baz

Confocal immunofluorescent localization of DE-cadherin (A-C, A'-C'), aPKC (A, A'', B, B''), and Bazooka (C, C'') in larval wing discs expressing wild type Par6 (A), Cdc42 binding mutant Par6 (B), and Cdc42-RNAi (C) with *ptc-gal4*. Scale bars represent 10  $\mu\text{m}$ .

**Figure S5.** Rok regulates compensatory proliferation and activates JNK

Confocal immunofluorescent localization of DE-cadherin (A, B), activated Caspase 3 (A'), and MMP1 (B') in larval wing discs expressing Rok-catalytic domain (Rok-CAT) alone (A) and with P35 (B) using *ptc-gal4*. Scale bars represent 100  $\mu\text{m}$ .

**Figure S6.** Disc Large depletion does not regulate phospho-MLC levels

Confocal immunofluorescent localization of DE-cadherin (A, A') and phospho-MLC (A''') in larval wing disc expressing Dlg-RNAi using *ptc-gal4*. Scale bar represent 40  $\mu\text{m}$ .

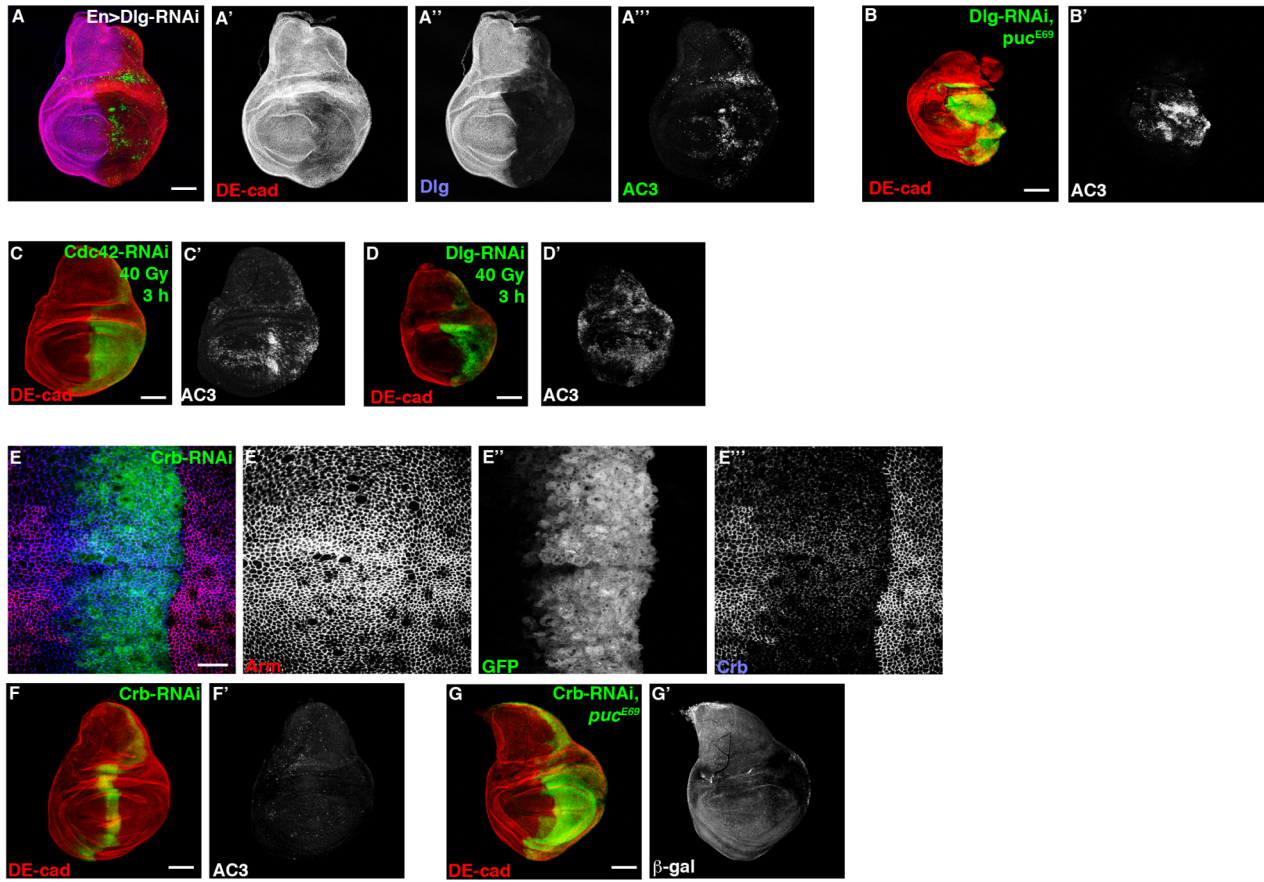

Supplemental Figure S1

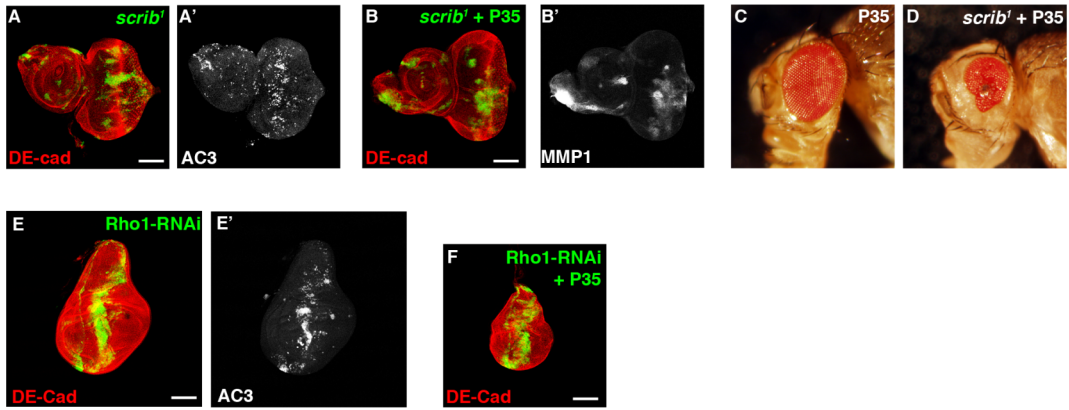

Supplemental Figure S2

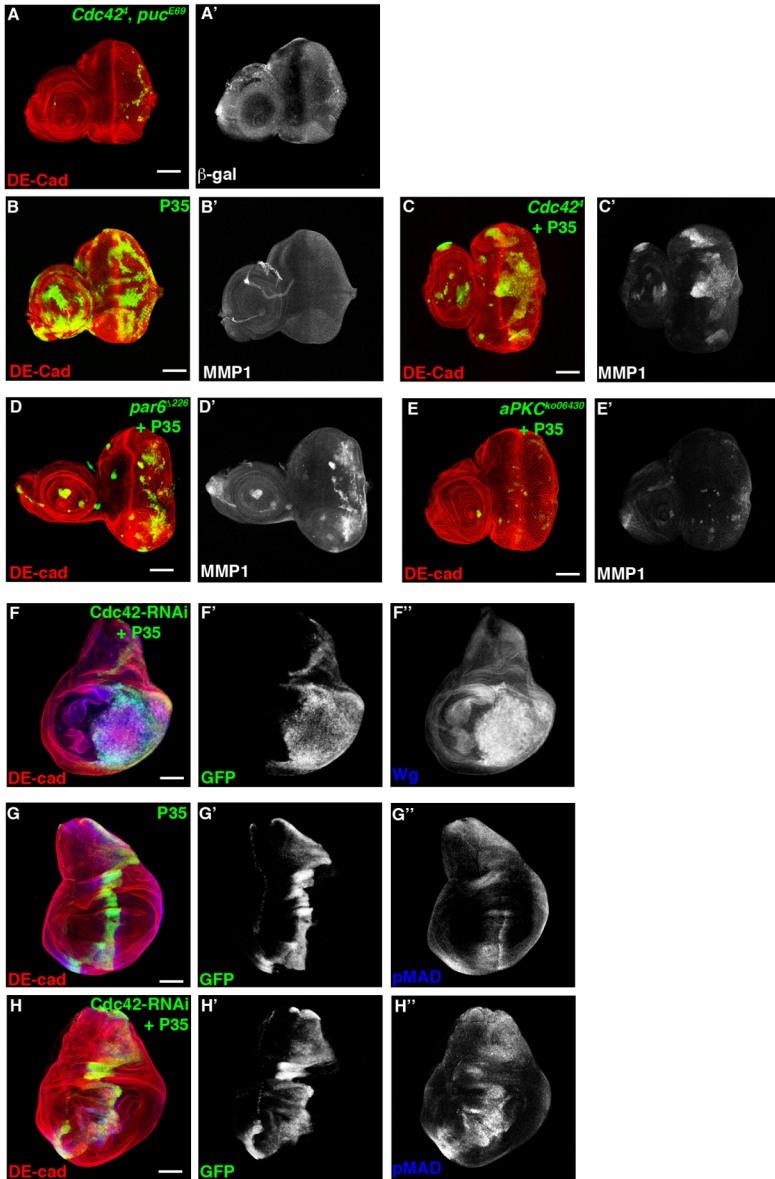

Supplemental Figure S3

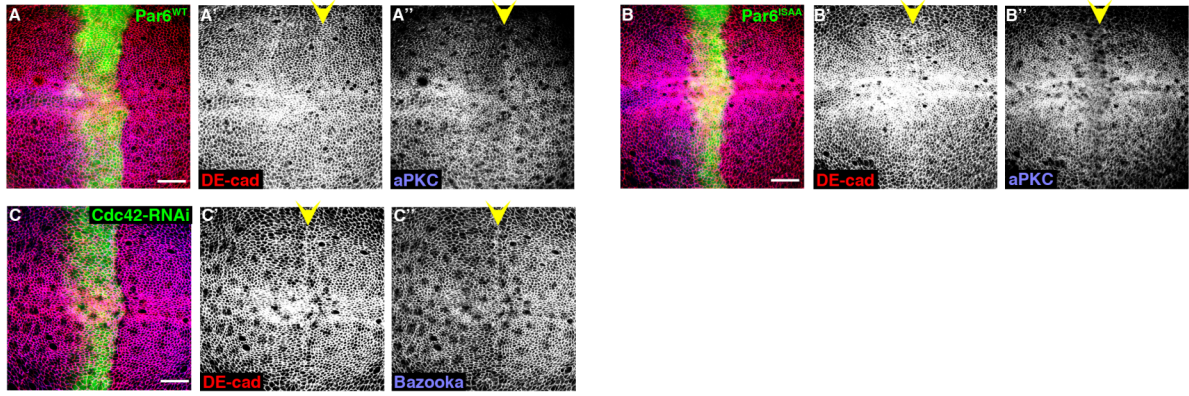

Supplemental Figure S4



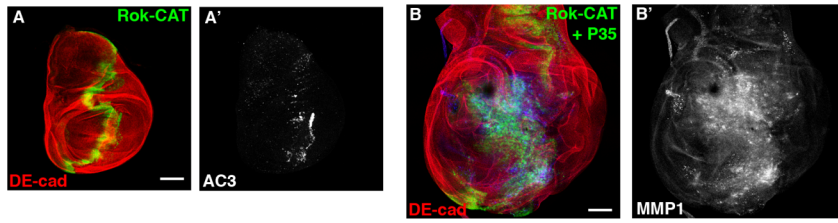

**Supplemental Figure 5**

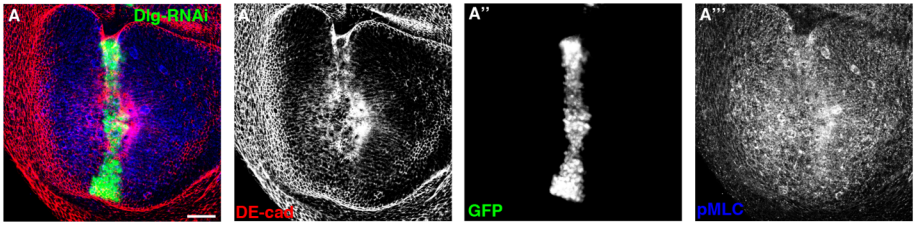

Supplemental Figure S6
